# Supplementary material for: Metabolic Plasticity and Combinatorial Radiosensitisation Strategies in Human Papillomavirus-Positive Squamous Cell Carcinoma of the Head and Neck Cell Lines
Source: MDPI journal article supplement (doi:10.3390/cancers13194836), 2021-09-28
Supplement: s1 [file s1]

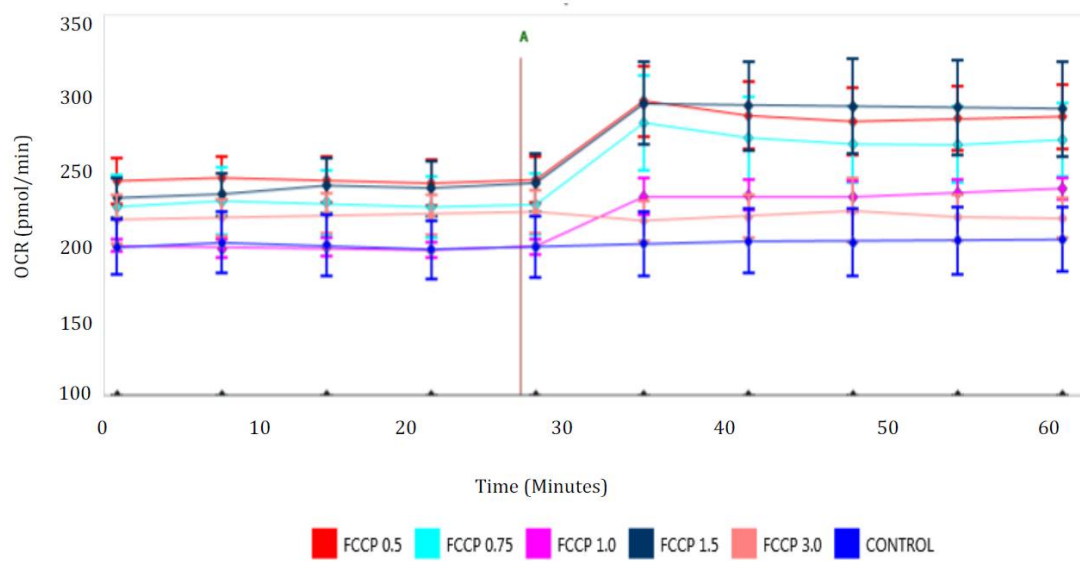

**Figure S1.** FCCP dose titration for UM-SCC-81B to ensure the reduced mitochondrial reserve was not related to suboptimal FCCP dosing.

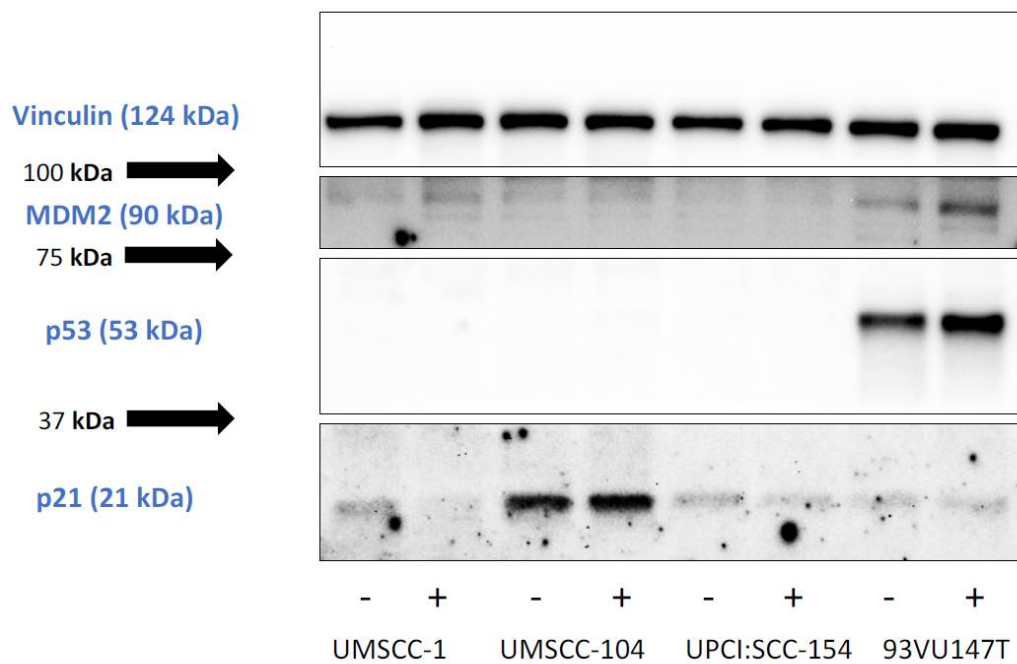

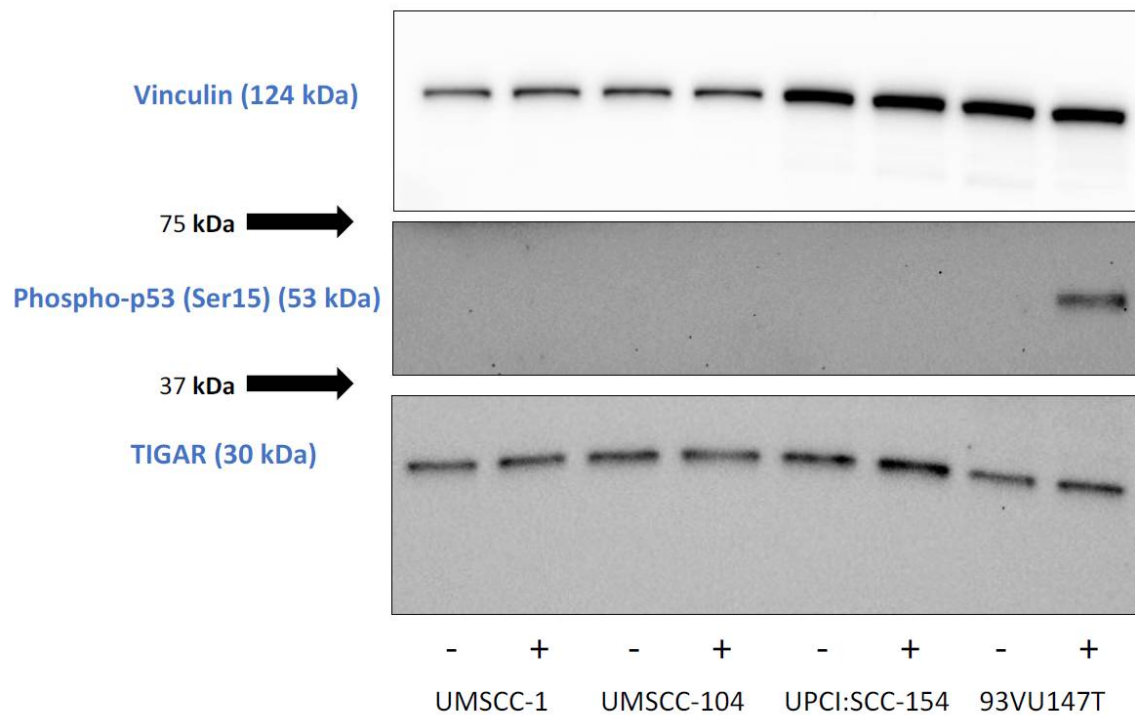

**Figure S2.** Original western blots.
